# Supplementary material for: Photodamage of the manganese–calcium oxide: a model for UV-induced photodamage of the water oxidizing complex in photosystem II
Source: Royal Society of Chemistry journal article supplement (doi:10.1039/c3dt50280e), 2013-01-01
Supplement: c3dt50280e.pdf [file c3dt50280e.pdf]

# **Electronic Supplementary Information.**

# **Photodamage of the manganese-calcium oxide: A model for UV-induced photodamage of the water oxidizing complex in photosystem II**

**Mohammad Mahdi Najafpour,<sup>\*a,b</sup> Babak Pashaei,<sup>a</sup> and Zahra Zand<sup>a</sup>**

<sup>a</sup> *Department of Chemistry, Institute for Advanced Studies in Basic Sciences (IASBS), Zanjan, 45137-66731, Iran*

<sup>b</sup> *Center of Climate Change and Global Warming, Institute for Advanced Studies in Basic Sciences (IASBS), Zanjan, 45137-66731, Iran*

*\*Corresponding author; Phone: (+98) 241 415 3201; E-mail: [mmnajafpour@iasbs.ac.ir](mailto:mmnajafpour@iasbs.ac.ir) (MMN).*

## **Experimental**

### **Materials**

All reagents were purchased from commercial sources and were used without further purification.

### **Characterization**

MIR spectra of KBr pellets of compounds were recorded on a Bruker vector 22 in the range between 400-4000  $\text{cm}^{-1}$ . TEM and SEM images were obtained with Philips CM120 and LEO 1430VP, respectively. The X-ray powder patterns were recorded with a Bruker, D8 ADVANCE (Germany) diffractometer (Cu-K $\alpha$  radiation). Manganese atomic absorption spectroscopy (AAS) was performed on an Atomic Absorbtion Spectrometer Varian Spectr AA 110. Prior to analysis, the oxide (2.0 mg) were added to concentrated nitric acid and H<sub>2</sub>O<sub>2</sub>, left at room temperature to ensure that the oxides were completely dissolved. The solutions were then diluted to 50.0 or 100.0 mL and analysed by AAS.

### **Photochemical experiments**

Photocatalytic reactions were carried out in a cylindrical round bottomed quartz photo-reactor and irradiated using 300 W high pressure mercury lamp under magnetic stirring at room temperature (Scheme S1).

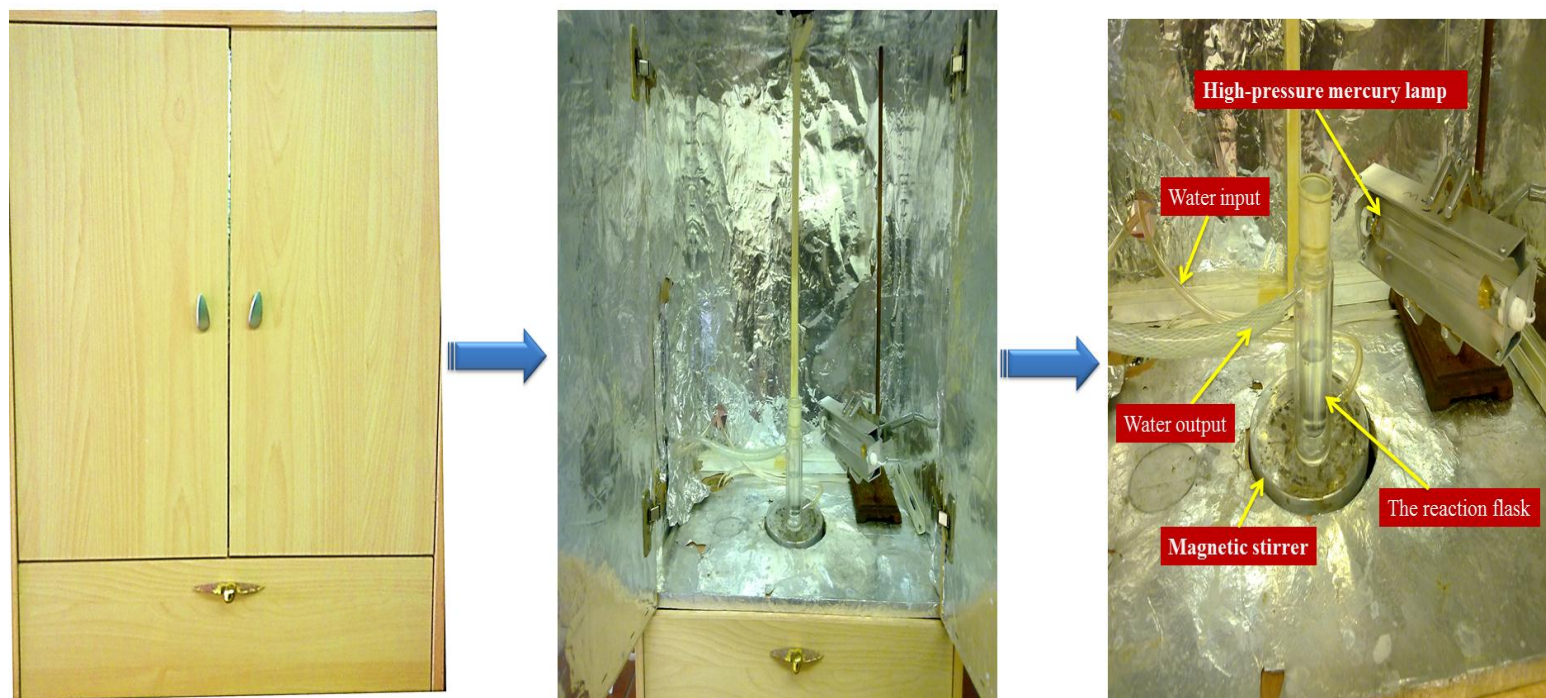

Scheme S1 The set up for photochemical experiments.

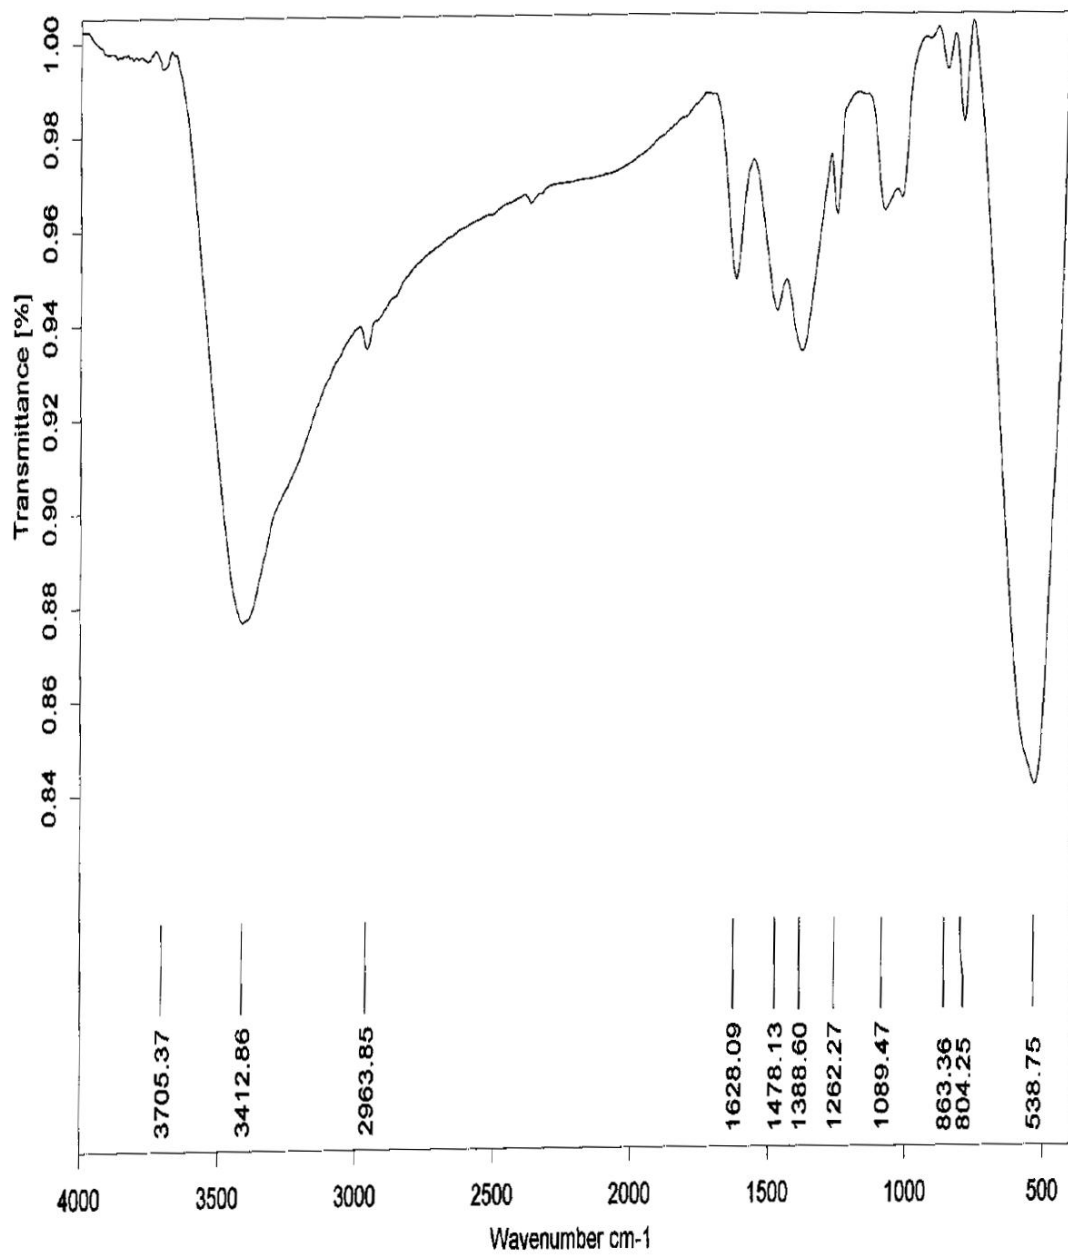

a

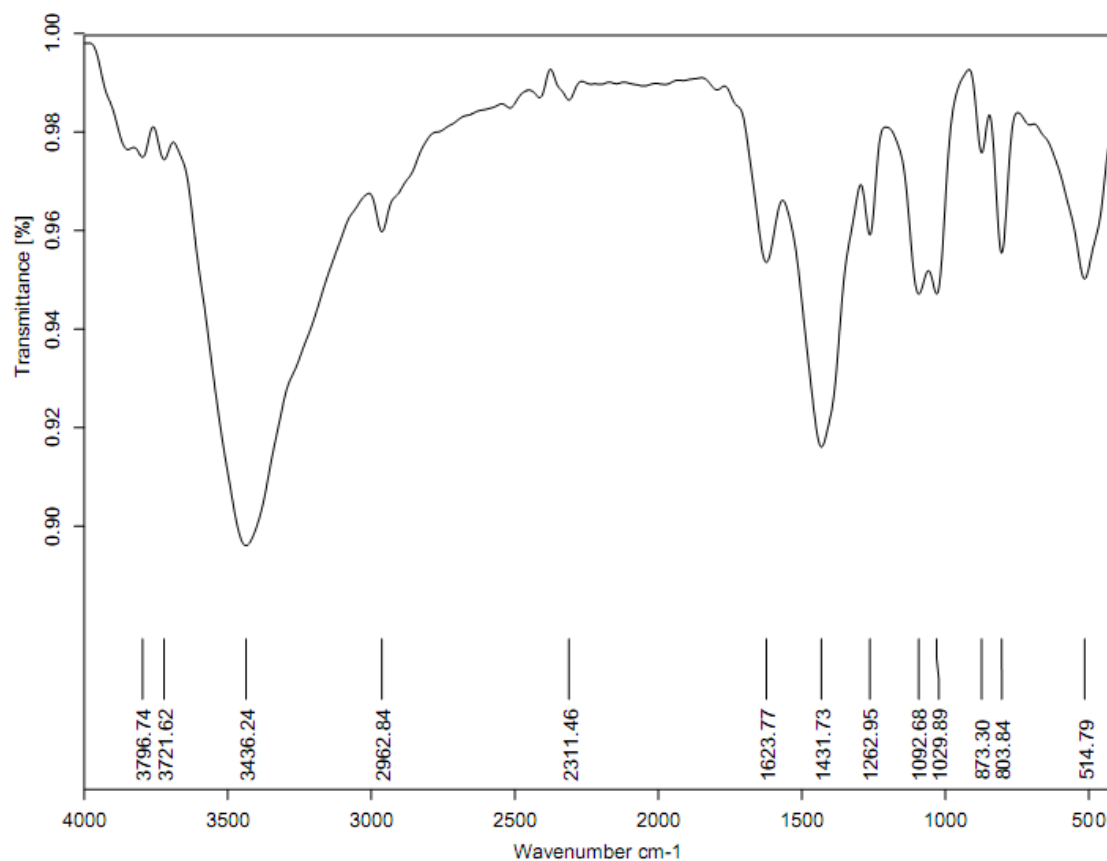

b

Fig. S2 IR spectra for Mn-Ca oxide (a) and Mn-Ca oxide after treatment with aspartic acid. The bands in 1431-1500  $\text{cm}^{-1}$  could show that carboxylate groups coordinate to Mn-Ca ions of Mn-Ca oxide in a bridging mode (b).<sup>1</sup>

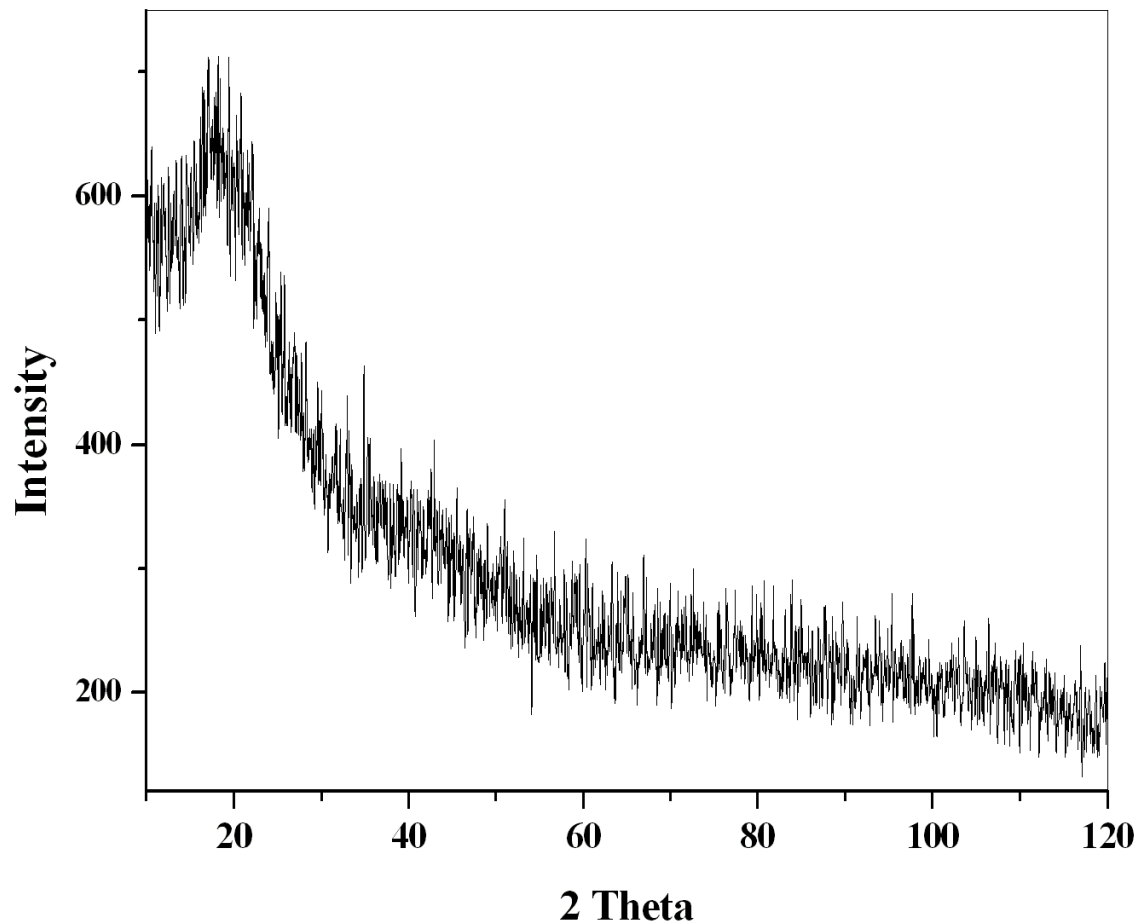

Fig. S3 XRD patterns of the nano-sized manganese-calcium oxide after heating at 500 °C for 10 h.

Reference:

1.K. Nakamoto in *Infrared and Raman Spectra of Inorganic and Coordination Compounds*, sixth edition, A Wiley-Interscience Publication, 2009, 64-65.
